# Supplementary material for: Development and Psychometric Properties of Surveys to Assess Patient and Family Caregiver Experience With Care Transitions
Source: Research Square preprint supplement (doi:10.21203/rs.3.rs-154517/v1), 2021-02-03
Supplement: Supplementary file 3 [file 98a395a14d91336e202ea088.docx]

**Title Page**

Development and psychometric properties of surveys to assess patient and family caregiver experience with care transitions

**Authors**

Joann Sorra, PhD*

Westat, US

Katarzyna Zebrak, PhD

Westat, US

Deborah Carpenter, RN, MSN

Westat, US

Theresa Famolaro, MPS, MS, MBA

Westat, US

John Rauch

Westat (retired), US

Jing Li, MD, DrPH, MS

Center for Health Services Research, University of Kentucky, US

Terry Davis, PhD

Louisiana State University, US

Huong Q. Nguyen, RN, PhD

Kaiser Permanente, California, US

Megan McIntosh

Center for Health Services Research, University of Kentucky, US

Suzanne Mitchell, MD, MS

Boston Medical Center/Boston University School of Medicine, US

Karen B. Hirschman, PhD MSW
[hirschk@nursing.upenn.edu](mailto:hirschk@nursing.upenn.edu)
University of Pennsylvania, School of Nursing US

Carol Levine, MA

United Hospital Fund, US

Jessica Miller Clouser, MPH

Center for Health Services Research, University of Kentucky, US

Jane Brock, MD, MSPH

Telligen, US

Mark V. Williams, MD

Center for Health Services Research, University of Kentucky, US

* Indicates corresponding author

**Supplemental T****able 1. Site-level reliability for the survey items (Patients**

**[PT], Time 1 caregivers [T1], Time 2 caregivers [T2])**

| **Survey items** | |  | **Site-level reliability** | **Avg # respondents**  **per site**  (Avg # for site-level  reliability = 0.70) |
| --- | --- | --- | --- | --- |
| Q2 | Hospital: Were you told/shown what to do? | PT | 0.67 | 193 (226) |
| T1 | 0.67 | 24 (28) |
| T2 | 0.59 | 24 (39) |
| Q3 | Hospital: Understood what to do at home? | PT | 0.65 | 209 (259) |
| T1 | 0.62 | 28 (39) |
| T2 | 0.61 | 28 (43) |
| Q4 | Hospital: Get to practice things you would need to do at home? | PT | **0.73** | 170 (149) |
| T1 | 0.55 | 15 (30) |
| T2 | 0.61 | 15 (23) |
| Q5 | Hospital: Explain things in a way you could understand? | PT | 0.65 | 210 (258) |
| T1 | 0.61 | 28 (42) |
| T2 | 0.59 | 28 (47) |
| Q6 | Hospital: Cared about you as a person? | PT | **0.73** | 210 (182) |
| T1 | 0.63 | 28 (39) |
| T2 | 0.56 | 28 (51) |
| Q7 | Hospital: Trusted HC prof's judgments? | PT | **0.79** | 210 (129) |
| T1 | 0.61 | 28 (42) |
| T2 | 0.59 | 28 (47) |
| Q8 | Hospital: Got information about symptoms to watch out for? | PT | **0.74** | 209 (175) |
| T1 | 0.68 | 28 (31) |
| T2 | 0.63 | 28 (38) |
| Q9 | Hospital: HC prof talked to you about prescription and OTC medicines? | PT | **0.79** | 203 (129) |
| T1 | 0.60 | 27 (42) |
| T2 | 0.67 | 27 (31) |
| Q10 | Hospital: Were side effects of medicine clear? | PT | ***0.69*** | 183 (192) |
| T1 | 0.54 | 23 (48) |
| T2 | 0.57 | 25 (43) |
| Q11 | Hospital: Helpfulness of written information | PT | **0.78** | 193 (126) |
| T1 | 0.65 | 23 (30) |
| T2 | 0.53 | 25 (51) |
| Q11_A | Hospital: Written information in Spanish? | PT | ***0.69*** | 20 (22) |
| T1 | 0.68 | 2 (3) |
| T2 | 0.62 | 4 (6) |
| Q12 | Hospital: Was doctor appointment scheduled? | PT | **0.92** | 211 (45) |
| T1 | **0.73** | 27 (23) |
| T2 | **0.78** | 28 (19) |
| Q13 (R) | Hospital: Was it too soon to leave hospital? (negatively worded) (reversed) | PT | **0.71** | 212 (205) |
| T1 | **0.72** | 27 (25) |
| T2 | 0.59 | 28 (46) |
| Q14 | Hospital: Reason because needed more care at home? | PT | 0.54 | 38 (76) |
| T1 | 0.62 | 9 (13) |
| T2 | 0.60 | 7 (11) |
| Q15 | Home: Had HC prof contact info? | PT | **0.76** | 211 (153) |
| T1 | 0.66 | 27 (33) |
| T2 | 0.63 | 40 (55) |
| Q16 | Home: Got help with problems or questions [when you contacted HC profs]? | PT | 0.66 | 126 (155) |
| T1 | 0.54 | 15 (31) |
| T2 | 0.54 | 23 (47) |
| Q17 | Home: Had to take any prescription or OTC medicine? | PT | **0.71** | 211 (204) |
| T1 | 0.44 | 27 (80) |
| T2 | 0.60 | 40 (63) |
| Q18 (R) | Home: Has there been a time when did not take medicine as directed? (negatively worded) (reversed) | PT | 0.65 | 180 (229) |
| T1 | 0.35 | 25 (108) |
| T2 | 0.53 | 37 (76) |
| Q19 | Home: Needed to use supplies or equipment? | PT | **0.72** | 212 (191) |
| T1 | 0.47 | 27 (70) |
| T2 | 0.64 | 41 (54) |
| Q20 | Home: How well been able to use supplies/equipment? | PT | 0.64 | 137 (180) |
| T1 | 0.54 | 21 (42) |
| T2 | 0.66 | 31 (37) |
| Q21 | Home: Had to take care of wound or surgical site? | PT | **0.82** | 210 (112) |
| T1 | 0.57 | 27 (47) |
| T2 | 0.60 | 40 (64) |
| Q22 | Home: How well been able to take care of wound/surgical site? (DROPPED FROM FINAL CAREGIVER SURVEYS) | PT | 0.50 | 68 (157) |
| T1 | --- | --- |
| T2 | --- | --- |
| Q23 | Home: Received transportation assistance? | PT | **0.78** | 211 (139) |
| T1 | --- | --- |
| T2 | --- | --- |
| Q24 | Home: Wanted transportation assistance? | PT | **0.83** | 170 (83) |
| T1 | --- | --- |
| T2 | --- | --- |
| Q25 | Home: Received meals? | PT | **0.74** | 213 (172) |
| T1 | --- | --- |
| T2 | --- | --- |
| Q26 | Home: Wanted meals? | PT | **0.82** | 189 (96) |
| T1 | --- | --- |
| T2 | --- | --- |
| Q27 | Home: Received physical/occupational therapy? (reversed) | PT | **0.88** | 212 (69) |
| T1 | --- | --- |
| T2 | --- | --- |
| Q28 | Home: Needed physical/occupational therapy? (reversed) | PT | 0.63 | 111 (155) |
| T1 | --- | --- |
| T2 | --- | --- |
| Q29 | Home: Had home visit? | PT | **0.90** | 212 (56) |
| T1 | **0.70** | 27 (27) |
| T2 | **0.71** | 40 (39) |
| Q30 | Home: Wanted home visit? | PT | **0.79** | 103 (67) |
| T1 | 0.58 | 14 (23) |
| T2 | **0.71** | 20 (20) |
| Q31 | Home: Talked with HC professional? | PT | **0.76** | 212 (159) |
| T1 | **0.74** | 27 (22) |
| T2 | 0.60 | 40 (64) |
| Q32 | Home: HC prof helped manage changes or unexpected problems? | PT | **0.71** | 124 (118) |
| T1 | 0.59 | 12 (19) |
| T2 | 0.51 | 17 (39) |
| Q33 | Home: Explained things in a way you could understand? | PT | 0.66 | 173 (209) |
| T1 | 0.65 | 19 (25) |
| T2 | 0.57 | 28 (49) |
| Q34 | Home: Cared about you as a person? | PT | 0.63 | 173 (241) |
| T1 | 0.61 | 19 (28) |
| T2 | 0.50 | 27 (63) |
| Q35 | Home: Trusted HC prof's judgments? | PT | 0.58 | 173 (294) |
| T1 | 0.51 | 19 (44) |
| T2 | 0.54 | 28 (56) |
| Q36 (R) | Home: HC prof told you something that went against what another HC prof said? (negatively worded) (reversed) | PT | 0.56 | 173 (313) |
| T1 | 0.46 | 19 (54) |
| T2 | 0.58 | 28 (48) |
| Q37 | Hospital: Rate hospital in preparing you for taking care of self/patient at home | PT | **0.84** | 208 (95) |
| T1 | 0.69 | 26 (29) |
| T2 | 0.56 | 28 (52) |
| Q38 | Home: Rate ability to take care of self/patient | PT | **0.75** | 209 (161) |
| T1 | 0.47 | 27 (72) |
| T2 | 0.55 | 40 (78) |
| Q39 | Home: Rate care from HC profs since home | PT | **0.77** | 182 (131) |
| T1 | 0.62 | 24 (34) |
| T2 | 0.56 | 37 (69) |
| Q40 | Overall, have HC profs been there as much as you needed? | PT | **0.74** | 205 (169) |
| T1 | **0.70** | 29 (29) |
| T2 | 0.63 | 40 (57) |

| Q41 | Rate physical health | PT | **0.77** | 210 (144) |
| --- | --- | --- | --- | --- |
| T1 | --- | --- |
| T2 | --- | --- |
| Q42 | Rate mental/emotional health | PT | **0.75** | 210 (164) |
| T1 | --- | --- |
| T2 | --- | --- |
| Q43 | Rate sleep | PT | 0.66 | 210 (248) |
| T1 | --- | --- |
| T2 | --- | --- |
| Q44 | Bodily pain | PT | **0.76** | 207 (153) |
| T1 | --- | --- |
| T2 | --- | --- |
| Q45 | Carry out everyday physical activities | PT | **0.79** | 209 (130) |
| T1 | --- | --- |
| T2 | --- | --- |

| Q46 | Home: Has a family member or friend helped care for you? | PT | **0.78** | 207 (138) |
| --- | --- | --- | --- | --- |
| T1 | --- | --- |
| T2 | --- | --- |
| Q49 | How confident are you in filling out medical forms by yourself? | PT | **0.87** | 212 (72) |
| T1 | --- | --- |
| T2 | --- | --- |
| Q50 | Do you usually ask someone to help you read materials you receive from the hospital? | PT | **0.79** | 212 (131) |
| T1 | --- | --- |
| T2 | --- | --- |
| CQ5 | Hospital: Did CG talk with any HC in hospital about the patient? | PT | --- | --- |
| T1 | 0.66 | 30 (37) |
| T2 | 0.48 | 33 (82) |
| CQ15 | Hospital: Did CG receive written information? | PT | --- | --- |
| T1 | 0.62 | 27(38) |
| T2 | 0.54 | 28(56) |
| CQ29 | Home: Patient received help for mental health problem? | PT | --- | --- |
| T1 | 0.48 | 27 (67) |
| T2 | 0.59 | 40 (64) |
| CQ30 | Home: CG wanted patient to receive help for mental health problem? | PT | --- | --- |
| T1 | 0.61 | 23 (34) |
| T2 | 0.47 | 34 (91) |
| CQ33 | Home visit scheduled when caregiver could be present? | PT | --- | --- |
| T1 | 0.66 | 15 (18) |
| T2 | 0.51 | 21 (47) |
| CQ44 | Home: How much effort for CG to care for patient? | PT | --- | --- |
| T1 | 0.64 | 26 (35) |
| T2 | 0.62 | 40 (57) |
| CQ45 | Home: How stressful for CG to care for patient? | PT | --- | --- |
| T1 | 0.59 | 27 (44) |
| T2 | 0.63 | 40 (55) |
| CQ46 | How caring for patient has changed from hospital until now? | PT | --- | --- |
| T1 | 0.57 | 26 (46) |
| T2 | 0.67 | 40 (47) |

Note: “Q”= patient and/or caregiver item; “CQ” = caregiver item. HC = healthcare; OTC = over the counter; CG = caregiver.
