# Supplementary material for: Development and Psychometric Properties of Surveys to Assess Patient and Family Caregiver Experience With Care Transitions
Source: Research Square preprint supplement (doi:10.21203/rs.3.rs-154517/v1), 2021-02-03
Supplement: Supplementary file 9 [file ac1b15b4f4c832e60ba54d64.docx]

**Title Page**

Development and psychometric properties of surveys to assess patient and family caregiver experience with care transitions

**Authors**

Joann Sorra, PhD*

Westat, US

Katarzyna Zebrak, PhD

Westat, US

Deborah Carpenter, RN, MSN

Westat, US

Theresa Famolaro, MPS, MS, MBA

Westat, US

John Rauch

Westat (retired), US

Jing Li, MD, DrPH, MS

Center for Health Services Research, University of Kentucky, US

Terry Davis, PhD

Louisiana State University, US

Huong Q. Nguyen, RN, PhD

Kaiser Permanente, California, US

Megan McIntosh

Center for Health Services Research, University of Kentucky, US

Suzanne Mitchell, MD, MS

Boston Medical Center/Boston University School of Medicine, US

Karen B. Hirschman, PhD MSW
[hirschk@nursing.upenn.edu](mailto:hirschk@nursing.upenn.edu)
University of Pennsylvania, School of Nursing US

Carol Levine, MA

United Hospital Fund, US

Jessica Miller Clouser, MPH

Center for Health Services Research, University of Kentucky, US

Jane Brock, MD, MSPH

Telligen, US

Mark V. Williams, MD

Center for Health Services Research, University of Kentucky, US

* Indicates corresponding author

**Supplemental Table 3. Survey items dropped from final surveys and reason for dropping**

| **Survey Item Dropped** | | **Dropped From:** | | | **Reason(s) for dropping** |
| --- | --- | --- | --- | --- | --- |
| **Patient** | **T1 CG** | **T2 CG** |
| Q19A | Home: Did not take medicine… Because forgot to take medicine? | **√** | **√** | **√** | High missingness (> 65%) in all three surveys  Conceptually, not a stand-alone item |
| Q19B | Home: Did not take medicine… Because could not afford? | **√** | **√** | **√** | Low variability and high missingness (> 65%) in all three surveys |
| Q19C | Home: Did not take medicine… Because of medicine side effects? | **√** | **√** | **√** | Low variability and high missingness (> 65%) in all three surveys |
| Q19D | Home: Did not take medicine… Because didn't know how/when to take medicine? | **√** | **√** | **√** | Low variability and high missingness (> 65%) in all three surveys |
| Q23 | Home: How well been able to take care of wound/surgical site? |  | **√** | **√** | Low variability and high missingness (> 65%) in caregivers surveys |
